# Supplementary material for: In Vitro Model of Bromodeoxyuridine or Iron Oxide Nanoparticle Uptake by Activated Macrophages from Labeled Stem Cells: Implications for Cellular Therapy
Source: Oxford University Press journal article supplement (doi:10.1634/stemcells.2007-0707), 2008-02-14
Supplement: stmcls_26_5_1366_s1.pdf [file stmcls_26_5_1366_s1.pdf]

### **Table 2-supplemental data.**

The ratios of cells used in modified Boyden Chamber experiments with HeLa cells and mouse fibroblasts.

Abbreviations used: AM; activated macrophages, FE-Pro; ferumoxides- protamine sulfate complex, BMSC; bone marrow stromal cells.

### **Figure 1-supplemental data.**

FE-Pro uptake by AM from live FE-Pro labeled human BMSC in the presence of MF. Representative FACS dot plots showing the viability of cells collected from the upper chamber (a), 14.6% of CD68-PE and dextran-FITC positive activated macrophages (AM) in the lower chamber after 96 hours of incubation (b), Bar graph showing the percentage of dextran and CD68 positive AM collected from the lower chamber (c), Bar graph showing no effect of bystander mouse fibroblasts on the FE-Pro uptake by AM after combining all ratios (d), summary bar graph showing no effect of mouse or human fibroblasts on the FE-Pro uptake by AM in combined two experiments (e), Representative Prussian Blue staining of AM recovered from the lower chamber after 96 hours of incubation, (magnification 40X) (f), Immunofluorescent detection of Dextran with anti-Dextran-FITC (Dex-FITC), CD68 with anti-CD68-Rhodamine on AM recovered from lower chambers after 96 hours of incubation (magnification 40X) (g). Data are presented as a mean  $\pm$  1 SD from 9 samples. \* = Significant differences ( $p < 0.05$ ) between 24 and 96 hours of incubation.

### **Figure 2-supplemental data**

FE-Pro uptake by AM from dead or dying FE-Pro labeled HeLa cells.

Representative FACS dot plots showing HeLa cells undergoing apoptosis (a), 15.5% of CD68-PE and dextran-FITC positive AM in the lower chamber after 96 hours of incubation (b), Bar graph showing the percentage of dextran and CD68 positive AM collected from the lower chamber (c), Prussian Blue staining of AM recovered from the lower chamber after 96 hours of incubation with FE-Pro labeled and unlabeled HeLa cells (d), Representative immunofluorescent detection of dextran with anti-dextran-FITC (Dex-FITC) and CD68 with anti-CD68-Rhodamine on AM recovered from the lower chamber (magnification 40X) (e), Data are presented as a mean  $\pm$  1 SD from 9 samples. \* = Significant differences ( $p < 0.05$ ) between 24 and 96 hours of incubation.
